1 **Title:** Elevated levels of interleukin-27 in early life compromise protective immunity during  
2 neonatal sepsis

3

4 **Authors:**

5 Brittany G. Seman<sup>a</sup>, Jordan K. Vance<sup>a\*</sup>, Travis W. Rawson<sup>a\*</sup>, Michelle R. Witt<sup>a</sup>, Annalisa B.  
6 Huckaby<sup>a</sup>, Jessica M. Povroznik<sup>ab</sup>, Shelby D. Bradford<sup>ab</sup>, Mariette Barbier<sup>ab</sup>, and Cory M.  
7 Robinson<sup>ab#</sup>

8

9 **Author's affiliations:**

10 <sup>a</sup>Department of Microbiology, Immunology, & Cell Biology, West Virginia University School of  
11 Medicine, Morgantown, West Virginia

12 <sup>b</sup>Vaccine Development Center at West Virginia University Health Sciences Center, Morgantown,  
13 West Virginia, USA.

14

15 **Running Head:** Elevated early life IL-27 compromises immunity

16

17 #Address correspondence to Cory M. Robinson, Ph.D., [cory.robinson1@hsc.wvu.edu](mailto:cory.robinson1@hsc.wvu.edu)

18 J.K.V. and T.W.R. contributed equally to this work.

19

20 **Abstract word count:** 248

21 **Text word count:** 5,804

22 **ABSTRACT**

23 Neonates are at increased risk for bacterial sepsis as a result of immature immunity. We  
24 established that the immune suppressive cytokine interleukin (IL)-27 is elevated in early life. In  
25 the present work, we hypothesized that increased levels of IL-27 may predispose the neonatal  
26 population to more severe infection during sepsis. In a neonatal sepsis model, systemic IL-27  
27 levels continued to rise during infection. Peripheral tissue analysis revealed systemic IL-27  
28 expression, while myeloid cell profiling identified Gr-1 and F4/80-expressing cells as the most  
29 abundant producers of IL-27 during infection. Increased IL-27 levels were consistent with  
30 increased mortality that was improved in *WSX-1<sup>-/-</sup>* mice that lack a functional IL-27 receptor.  
31 Infected *WSX-1<sup>-/-</sup>* pups exhibited improved weight gain and reduced morbidity. IL-27 signaling  
32 in WT mice promoted increased bacterial burdens and systemic inflammation compared to  
33 *WSX-1<sup>-/-</sup>* neonates. This was consistent with more efficient bacterial killing by Ly6B.2<sup>+</sup> myeloid  
34 cells and macrophages from *WSX-1*-deficient compared to wild-type neonates. Live animal  
35 imaging further supported a more severe and disseminated infection in WT neonates. This is the  
36 first report to describe the impact of elevated early life IL-27 on the host response in neonates  
37 while also defining the cell and tissue sources of cytokine. IL-27 is frequently associated with  
38 suppressed inflammation. In contrast, our findings demonstrate that IL-27 promotes  
39 inflammation during neonatal sepsis by directly compromising control of bacteria that drive the  
40 inflammatory response. Collectively, our results suggest that IL-27 represents a therapeutic  
41 target to limit susceptibility and improve infectious outcomes in neonatal sepsis.

42

43 **IMPORTANCE**

44           A number of differences in the neonatal immune response compared with adults have  
45 been well described. However, a mechanistic understanding of what needs to be overcome in the  
46 neonate to generate a more protective immune response during acute bacterial infection has been  
47 limited. The work described here helps fill the gap of what is necessary to overcome in order to  
48 achieve improved host response to infection. To further the novelty, IL-27 has not previously  
49 been attributed to dysfunction or deficiency in neonatal immunity. Our results enhance the  
50 understanding of IL-27 biology in the neonatal population while providing evidence that elevated  
51 IL-27 levels limit a protective immune response and are detrimental during neonatal sepsis.  
52 Strategies aimed at targeting circulating IL-27 concentrations early in life have the potential to  
53 improve control of bacterial infection in neonates.

54 **INTRODUCTION**

55 Neonates are highly vulnerable to bacterial infections and at increased risk of mortality.  
56 Accuracy identifying the true global incidence of neonatal sepsis is influenced by challenges  
57 with diagnostic criteria and reliable reporting, but current estimates indicate approximately 3  
58 million infections annually (1). In the United States alone, greater than 75,000 neonatal  
59 infections are reported annually due to sepsis (2). The rate of cases per live birth increases  
60 considerably with factors such as low-birth-weight and premature delivery (2). Sepsis is a  
61 leading cause of morbidity mortality among infants in the first few days of life at any birth  
62 weight (3). This is especially true for very low birth weight infants where sepsis also  
63 significantly increases the length of hospital stay (4, 5).

64 Increased susceptibility to infection in neonates is reflective of a distinct immune profile  
65 relative to adults that is often referred to as immature. Phenotypic and functional differences in  
66 innate and adaptive immune function have been described in early life. In general, neonatal  
67 immunity is considered biased toward a Th2/Treg response (6). Fewer numbers of immune cells  
68 have been found in circulation with defects reported in microbial elimination processes, antigen  
69 presentation, T cell priming, and T cell receptor repertoires (7-9). In addition, increased amounts  
70 of cytokines such as IL-10, IL-23, and IL-27 are present, further supporting an anti-inflammatory  
71 bias (10-12). This is consistent with reduced production of tumor necrosis factor (TNF)- $\alpha$  from  
72 neonatal cells in response to TLR ligands compared with those from adults (13). Since adequate  
73 Th1 responses can be induced in neonates *in vivo* when given the appropriate stimulus, innate  
74 immune cells may provide signals that delay or misdirect the adaptive immune response (14).  
75 Cumulatively, these immune findings are thought to contribute to the increased susceptibility of  
76 neonates to infection.

77 Interleukin-27 (IL-27) is a heterodimeric cytokine that consists of the Epstein-Barr virus-  
78 induced gene 3 (EBI3) and IL-27p28 proteins (15). Engagement of the IL-27 receptor, composed  
79 of WSX-1 and gp130, predominantly activates JAK-STAT signaling (16-18). IL-27, similar to  
80 other members of the IL-12 family, was originally described as a cytokine that could drive  
81 proliferation of naïve CD4<sup>+</sup> T cells (19). However, mice deficient for WSX-1 mount Th1  
82 responses (18, 20-23). In these same animals, models of chronic disease and infection  
83 demonstrate T cell hyperactivity suggesting that additional immune suppressive activity may  
84 dominate (18, 21-24). Indeed, IL-27 antagonizes inflammatory T cell subsets by blocking IL-2  
85 production, and activates IL-10 production by Treg cells (25). Similarly, innate immune function  
86 is inhibited by IL-27. In macrophages, inflammatory cytokine production, inflammatory cytokine  
87 receptor expression and signaling, intracellular trafficking to lysosomes, and lysosomal  
88 acidification are negatively regulated by IL-27 (22, 26-31). This regulatory activity has been  
89 shown to compromise control of *M. tuberculosis*, *S. aureus*, *P. aeruginosa*, and *E. coli* (12, 26,  
90 27, 30, 31). On the other side of the spectrum, IL-27 induces an inflammatory profile in  
91 monocytes (32). Cumulatively, this body of literature suggests that IL-27 has important immune  
92 regulatory function and opposes clearance of bacteria by macrophages. The effect of IL-27 may  
93 be cell type and context-dependent, and the net influence on the complete host response in  
94 neonates has not been understood.

95 We have established that IL-27 is produced at elevated levels early in life. Human  
96 macrophages derived from umbilical cord blood express IL-27p28 and EBI3 genes at increased  
97 levels compared with macrophages derived from adult peripheral blood (11). This was  
98 accompanied by greater levels of secreted IL-27 protein (33). Similarly, transcript levels for IL-  
99 27 genes were increased in the spleens of neonatal and infant mice relative to adults (11). A

100 similar pattern of IL-27 production was observed in splenic macrophages from neonatal and  
101 infant mice (11). Recently, myeloid-derived suppressor cells (MDSCs) were shown to be a  
102 significant source of IL-27, and these cells were more abundant in neonates than other age  
103 groups (12). Other reports have shown a greater abundance of MDSCs in human blood during  
104 the neonatal period (34, 35).

105 Considering the immune suppressive activity of IL-27, we have hypothesized that elevated  
106 IL-27 early in life contributes to enhanced susceptibility to bacterial infection. IL-27 has been  
107 suggested as a biomarker for critically ill children and more recently declared a biomarker for  
108 early onset neonatal sepsis (EONS) (36, 37). In the present body of work, we examined the  
109 impact of IL-27 on host protection during neonatal sepsis. We developed a murine model of  
110 EONS in response to *Escherichia coli*. While Group B streptococci are the leading cause of  
111 EONS overall, *E. coli* is responsible for the majority of deaths and is the leading cause when pre-  
112 term and very-low birth weight babies are considered independently (3, 38). Our findings  
113 demonstrate that IL-27 compromises host control of bacteria, consistent with elevated levels of  
114 inflammation and increased mortality.

115

## 116 **MATERIALS AND METHODS**

117 **Animals.** Breeding pairs of C57BL/6 (WT) or WSX-1-deficient (KO) mice on a  
118 C57BL/6 genetic background were purchased from Jackson Laboratories (Bar Harbor, ME) and  
119 maintained at West Virginia University School of Medicine. Male and female pups were used  
120 for experimental infection. Mice in this study were defined as neonates through 8 days of life as  
121 described previously (11, 12). Blood and tissues were collected from mice at the appropriate age

122 by humane procedures. All procedures were approved by the West Virginia University  
123 Institutional Animal Care and Use Committees and conducted in accordance with the  
124 recommendations from the *Guide for the Care and Use of Laboratory Animals* by the National  
125 Research Council (NRC, 2011).

126 ***Bioluminescent E. coli.*** *E. coli* O1:K1:H7 (ATCC, Manassas, VA) was transformed with  
127 the pGEN-luxCDABE plasmid (Addgene #44918) by electroporation using a Micropulser (Bio-  
128 Rad, Hercules, CA). This plasmid contains five *lux* genes with a selectable ampicillin resistance  
129 marker (Amp<sup>R</sup>). To generate a stable integration, *E. coli* O1:K1:H7 was transformed with the  
130 pMQ-tn-PnptII-lux suicide vector (a gift by Dr. Robert Shanks, University of Pittsburgh). This  
131 plasmid contains a transposable element upstream of five *lux* genes, with a selectable ampicillin  
132 resistance marker (Amp<sup>R</sup>). Transformation was performed by mating with the auxotrophic  
133 strain RHO3 (39). Transformants were selected on ampicillin-supplemented LB agar and  
134 screened for luminescent signal on a chemiluminescent imager. Luminescence was monitored  
135 through 48 h of growth and infection to assess plasmid retention. Intravital imaging was  
136 performed with *E. coli* expressing luciferase from the transformed plasmid. *E. coli* with stably  
137 integrated *lux* genes were used in gentamicin protection assays to evaluate bacterial clearance.

138 ***Murine sepsis infection model.*** Neonatal pups at the ages of 3 or 4 days were infected  
139 subcutaneously in the scapular region with *E. coli* strain O1:K1:H7. The bacteria from pre-titered  
140 frozen cultures were washed with PBS, centrifuged at 2,000 x g for 5 min, and suspended in a  
141 volume of PBS equivalent to an inoculum of 50  $\mu$ L/mouse. Mice were inoculated using a 28-  
142 gauge insulin needle (Covidien, Dublin, Ireland). Vehicle (PBS)-inoculated pups were identified  
143 from bacteria-infected pups using a tail snip. Survival studies were performed with an inoculum  
144 of  $\sim 10^7$  CFUs/mouse representing an approximate LD<sub>50</sub>. Other experiments to evaluate infection-

145 related parameters were performed with a target inoculum of  $\sim 2 \times 10^6$  CFUs/mouse to reduce  
146 mortality so that sufficient numbers of control and infected animals could be studied in each  
147 experiment. Weights of mice were recorded immediately prior to infection and then daily  
148 thereafter. Following infection, mice were monitored twice daily for signs of morbidity. Mice  
149 exhibiting signs of morbidity (i.e., unable to right themselves, significant weight loss, and lack of  
150 movement) that met endpoint criteria were humanely euthanized. Peripheral tissues (spleen,  
151 liver, kidney, brain, and lung) isolated from pups were placed in PBS on ice. Blood was  
152 deposited in tubes that contained 5  $\mu$ L of 500 mM ethylenediamine tetraacetate acid (EDTA,  
153 Fisher Scientific, Fair Lawn, NJ).

154 ***Bacterial burdens.*** Peripheral tissues were homogenized in PBS using a handheld pestle  
155 motor (Kimble Chase, Vineland, NJ). Tissue homogenates and blood were serially diluted in  
156 PBS and bacteria enumerated by standard plate counting on tryptic soy agar (TSA; Becton,  
157 Dickinson and Company, Sparks, MD). Agar plates were incubated at 37°C overnight.

158 ***Intracellular Cytokine Staining.*** Spleens were crushed in a 40- $\mu$ m nylon strainer. Single  
159 cell suspensions were treated with ACK lysis buffer (Lonza, Walkersville, MD) to lyse red blood  
160 cells and washed in PBS that contained 10% FBS. Blood was pooled from control or infected  
161 mice and washed in PBS. Peripheral blood mononuclear cells (PBMCs) were isolated by Ficoll  
162 (GE Healthcare Life Sciences, Chicago, IL) density gradient centrifugation at 400 x g for 30  
163 minutes. Splenocytes and PBMCs were then treated with FcR blocking reagent (Miltenyi Biotec,  
164 Bergisch Gladbach, Germany) and GolgiStop (Protein Transport Inhibitor, Becton Dickinson,  
165 Franklin, NJ) to inhibit protein secretion. Cell surface markers were immunolabeled with anti-  
166 Gr-1 (PE Rat Anti-Mouse Ly6G and Ly6C, BD Pharmingen, Franklin, NJ), F4/80 (Anti-F4/80  
167 PE, Miltenyi Biotec), CD11c (CD11c-PE, Miltenyi Biotec), or CD115 (CD115-PE, Miltenyi



168 Biotec), washed, and fixed with 3% paraformaldehyde. Intracellular cytokine IL-27 was labeled  
169 with anti-mIL-27 (R&D Systems, Minneapolis, MN) as described previously (11).  
170 Immunolabeled cells were analyzed with a BDFortessa flow cytometer and FCS Express  
171 (version 6; De Novo Software, Glendale, CA).

172 ***Quantitative real time PCR.*** Spleens were homogenized in TRI Reagent<sup>®</sup> (Molecular  
173 Research Center, Cincinnati, OH). Using the commercial product protocol, the upper aqueous  
174 layer following phase separation was mixed with an equal volume of 75% ethanol and  
175 transferred to EZNA RNA isolation columns (Omega Biotek, Norcross, GA). iScript<sup>™</sup> cDNA  
176 synthesis reagents (Bio-Rad, Hercules, CA) were used to generate first strand cDNA according  
177 to manufacturer protocol. Real time cycling of reactions that included cDNA diluted 15-fold  
178 from above, gene-specific primer probe sets (Applied Biosystems, Foster City, CA), and iQ<sup>™</sup>  
179 Supermix (Bio-Rad) was performed in triplicate using a Step One Plus (Applied Biosystems)  
180 real time detection system. Gene-specific amplification was normalized to  $\beta$ -actin as an internal  
181 reference gene. Log<sub>2</sub> transformed changes in gene expression relative to control spleens were  
182 determined using the formula  $2^{-\Delta\Delta Ct}$ .

183 ***Cytokine measurements.*** Blood was collected from mice during euthanasia at the  
184 indicated age and serum collected by standard techniques. IL-1, IL-6, and TNF- $\alpha$  serum levels  
185 were measured using multiplexed luminescent detection reagents according to manufacturer's  
186 protocol (MesoScale Discovery, MSD, Rockville, MD). Serum or culture supernatant  
187 concentrations of IL-27p28 were measured using single analyte luminescent detection reagents  
188 (MesoScale Discovery). Results were analyzed using MSD Discovery Workbench software.  
189 Protein standards were assayed in parallel with samples.

190           ***In vivo imaging.*** Neonatal pups were imaged using an IVIS SpectrumCT (Perkin Elmer,  
191 Waltham, MA). Mice were infected with the bioluminescent *E. coli* and imaged over time for  
192 location and intensity of luminescence. To decipher between individual mice over time, tails  
193 were tattooed using a 28-gauge insulin needle that inserts green or black tattoo paste (Ketchum  
194 Manufacturing, Lake Luzerne, NY). Pups were anesthetized using an isoflurane chamber and  
195 kept under anesthesia during imaging. Luminescence signal and images were processed using  
196 Living Image 4.5 software (Perkin Elmer, Waltham, MA). Briefly, signal was quantified by  
197 region of interest (ROI) construction around the area of luminescence in 2D images. Signal was  
198 quantified in radiance units, and represented as total flux (photons/second). Luminescence scales  
199 were set according to the colorimetric scale for WT or KO mice at each time point due to the  
200 profound differences in signal between the two genotypes.

201           ***Gentamicin protection bacterial clearance assays.*** To generate bone marrow-derived  
202 macrophages (BMDM), bone marrow progenitors were extracted from femurs, tibias, radius-  
203 ulna, and humerus bones of C57BL/6 or WSX-1<sup>-/-</sup> neonatal mice in  $\alpha$ -MEM (MEM; Corning,  
204 NY) containing 10% FBS, 2 mM glutamine, and 100 U/mL penicillin/streptomycin. The  
205 contents were strained through a 40-um nylon strainer to remove residual tendon and ligament  
206 tissue, and erythrocytes were lysed using 0.2% sodium chloride and neutralized in 1.6% sodium  
207 chloride. Following a wash with phosphate-buffered saline (PBS), bone marrow cells were  
208 differentiated in DMEM that contained 2 mM glutamine, 25 mM HEPES, 10% FCS, and 10% L-  
209 cell-conditioned medium for 5-7 days at 37°C with 5% CO<sub>2</sub> as described previously (12).  
210 MDSCs were cultured in DMEM that contained 2 mM glutamine, 25 mM HEPES, and 10%  
211 FCS. Ly6B.2<sup>+</sup> and F4/80<sup>+</sup> cells were isolated from splenocytes prepared as described above by  
212 immunomagnetic selection using Miltenyi isolation reagents (Miltenyi Biotec, Bergisch

213 Gladbach). BMDMs, F4/80<sup>+</sup>, or Ly6B.2<sup>+</sup> cells, were cultured with luciferase-expressing *E. coli*  
214 at a multiplicity of infection (MOI) of 50 for 1 h at 37°C and 5% CO<sub>2</sub>. The medium was then  
215 replaced with fresh supplemented with gentamicin (100 µg/mL) and the cultures returned to  
216 incubation for an additional 4 h. Bacterial luminescence was measured using a Molecular  
217 Devices iC3 at 3 and 6 h post-infection (San Jose, CA).

218 **Statistical Analysis.** All statistical analyses were performed using GraphPad Prism  
219 software (version 8; La Jolla, CA). Data was tested using the appropriate parametric or  
220 nonparametric measures, as indicated in the figure legends. The threshold for statistical  
221 significance was set to 0.05.

222

## 223 **RESULTS**

224 ***IL-27 levels rise during neonatal sepsis.*** Neonates exhibit elevated levels of IL-27 in the  
225 spleen and blood at resting state relative to adults (11, 12). To determine if IL-27 levels continue  
226 to rise during infection and how the cytokine may impact the host response, we established a  
227 murine model of neonatal sepsis. Neonatal pups were infected with *E. coli* O1:K1:H7 on day 4 of  
228 life. IL-27 gene expression was measured in the lungs, liver, spleen, kidneys, and brains of mice  
229 at 10 and 24 h following infection. These time points were chosen to span a critical window in  
230 the experimental model. These time points were chosen to span a critical window during  
231 infection. IL-27 gene expression varied with different tissues (Fig. 1A-B). While some infected  
232 pups expressed increased levels of IL-27p28 and EBI3 transcripts in all tissues examined, in  
233 several tissues, there were some pups that did not increase IL-27 gene expression (Fig. 1A-B). At  
234 the earlier 10 h time point, the most consistent increases in IL-27p28 and EBI3 expression were  
235 observed in the lungs, kidneys, and spleen of infected neonates (Fig. 1A). Surprisingly, the latter

236 was the site of the greatest magnitude of increase in IL-27 expression (Fig. 1). At 24 h post-  
237 infection, more pups increased expression of IL-27 genes in all tissues except the liver; however,  
238 there were still some animals that maintained lower expression levels (Fig. 1B). To further  
239 analyze IL-27 systemically during infection, serum concentrations were measured by  
240 electrochemiluminescent immunoassay on days 1 and 2 post-infection. As shown in Figure 1C,  
241 IL-27 increased in circulation and peaked following the first day of infection in neonatal mice.  
242 While the mean IL-27 levels increased significantly more than three-fold, the population  
243 separated into higher and lower expressers similar to the gene expression data (Fig. 1C). A three-  
244 fold increase in IL-27 levels was maintained in infected pups relative to controls at day 2 post-  
245 infection, but at reduced overall magnitude (Fig. 1C). These data demonstrate that although IL-  
246 27 levels are higher at baseline in neonates relative to older populations, the levels continue to  
247 rise further during infection. Furthermore, the infected population of neonates at 24 h includes  
248 those expressing IL-27 genes and producing cytokine at higher levels, as well as those that better  
249 control IL-27 production. This could have implications on the progression and outcome of the  
250 infection.

251 ***Gr-1<sup>+</sup> and F4/80<sup>+</sup> cells are the most abundant IL-27 producers.*** We have previously  
252 shown that MDSCs and macrophages are the dominant cellular sources of IL-27 in neonatal mice  
253 in the absence of infection (11, 12). To determine cell types that contribute to the rising IL-27  
254 levels during infection, we profiled cells in the blood and spleens by immunofluorescent labeling  
255 and flow cytometry. Both tissues are primary sites of infection and disseminated bacteria, as well  
256 as compartments with a significant population of myeloid cells. Our analysis evaluated IL-27  
257 production in cells positive for Gr-1, F4/80, CD11c, and CD115. In the spleen and the blood, Gr-  
258 1<sup>+</sup> cells were the most abundant cell type that produced IL-27 followed by a significant

259 contribution from F4/80<sup>+</sup> cells at 10 (Figs. 2A and B, 3A and B) and 24 h (Figs. 2A and D, 3A  
260 and D, S1, S2) post-infection. Surprisingly, there was no difference in the frequency of any IL-  
261 27-producing cell type in infected pups relative to controls in the spleen or the blood (Figs. 2, 3,  
262 S1, and S2). However, the mean fluorescent intensity (MFI) of IL-27 signal, indicative of the  
263 amount of IL-27 protein per cell, was increased in the spleen at 10 h in cells expressing all  
264 myeloid markers examined (Fig. 2C). CD115<sup>+</sup> cells were associated with a substantial increase  
265 of nearly 100% during infection (Fig. 2C). Increased IL-27 expression was maintained at a  
266 significant level in CD11c<sup>+</sup> cells at 24 h post-infection (Fig. 2E). Increased production in Gr-1<sup>+</sup>  
267 and F4/80<sup>+</sup> cells at 24 h was trending toward and nearly statistically significant (Fig. 2E). In the  
268 blood, only CD115<sup>+</sup> and F4/80<sup>+</sup> cells increased IL-27 production at either time point during  
269 infection, although these changes did not reach statistical significance (Fig. 3C and E). This  
270 analysis demonstrates that in the blood and spleen myeloid cells positive for Gr-1 and F4/80 are  
271 the most abundant producers of IL-27, while cells expressing all myeloid markers examined in  
272 the spleen likely contribute to the elevated IL-27 levels observed in infected neonates.

273 ***IL-27 promotes mortality and poor weight gain during neonatal sepsis.*** We further  
274 investigated the impact of elevated IL-27 levels on survival during neonatal sepsis. Mice  
275 deficient for WSX-1 (KO) in the C57BL/6 background do not express a functional IL-27  
276 receptor and cannot respond to the cytokine. Morbidity and mortality were monitored over 4  
277 days of parallel infection in KO and wild-type (WT) mice. A striking improvement in survival  
278 was observed in the absence of IL-27 signaling (Fig. 4A). Infected pups gained weight at a level  
279 comparable to uninfected controls in the KO group (Fig. 4B). In contrast, infected WT pups  
280 lagged significantly behind control pups in weight gain, an indication of morbidity (Fig. 4B).  
281 When the change in weight was expressed relative to the control pups in each group, a highly

282 significant improvement in weight gain was evident in WSX-1<sup>-/-</sup> neonates (Fig. 4C). This has  
283 important implications in human neonatal sepsis. The highest level of serum IL-27 at 24 h post  
284 infection also correlates with a critical time period in disease progression (Fig. 1C and 4A). Pups  
285 that remain viable through 2 days most frequently remain viable through a 4 day infection (Fig.  
286 4A). As such, the day 2 post-infection population is enriched for mice that are likely to remain  
287 viable through the duration of infection and may represent some survivor bias. Although we  
288 cannot definitively show that pups deceased at day 1 or pups viable at day 1 and deceased at day  
289 2 had higher circulating levels of IL-27, the trends in IL-27 gene expression, serum levels, and  
290 mortality suggest the possibility that IL-27 levels are maintained at lower concentration in  
291 neonatal animals most likely to survive the infection (Fig. 1 and 4A). Collectively, these results  
292 indicate that IL-27 interferes with a protective host response.

293 ***IL-27 signaling opposes host clearance of bacteria during neonatal sepsis.*** To  
294 determine if improved survival in WSX<sup>-/-</sup> mice is consistent with improved control of bacteria,  
295 we evaluated burdens in WT and KO mice 24 h post-infection. In the absence of IL-27 signaling,  
296 neonatal pups exhibited improved control of bacteria in the blood and all peripheral tissues  
297 examined (Fig. 5). To further explore mechanisms responsible for improved control of bacteria  
298 in WSX-1<sup>-/-</sup> pups, we evaluated the ability of individual phagocytes to clear *E. coli in vitro*. The  
299 myeloid-restricted marker Ly6B.2 is highly expressed on neutrophils, inflammatory monocytes,  
300 and some populations of macrophages (40). Ly6B.2<sup>+</sup> cells and bone marrow-derived  
301 macrophages (BMDMs) from WSX-1<sup>-/-</sup> mice eliminated *E. coli* with increased efficiency early  
302 during infection (Fig. 5B and C). Similar results were obtained with F4/80<sup>+</sup> cells isolated from  
303 WT and WSX-1 KO spleens (data not shown). TNF- $\alpha$  levels were lower in Ly6B.2<sup>+</sup> cells from  
304 WSX-1<sup>-/-</sup> pups during *in vitro* infection and marginally higher in BMDMs at 6 h only (Fig. 5D

305 and E). Similar results were observed for IL-6 (data not shown). Improved bacterial clearance in  
306 WSX-1<sup>-/-</sup> phagocytes in the absence of consistently higher levels of TNF- $\alpha$ , suggests that killing  
307 of bacteria is independent of proinflammatory cytokine production and may be a direct result of  
308 IL-27 signaling. We have previously reported that IL-27 opposes lysosomal acidification and  
309 trafficking in human macrophages with consequences to control of intracellular and extracellular  
310 bacterial growth (26, 27, 30, 31).

311 We next wanted to examine the kinetics of bacterial clearance in real time with a focus on  
312 the critical early phase of the infection. We infected WT and KO pups with luciferase-expressing  
313 *E. coli*, and longitudinally imaged individual mice over a 24-hour period. Consistent with CFU  
314 counts in harvested tissues, there was a robust difference in luminescent signal from KO pups.  
315 As a result, WT and KO mice could not be analyzed on the same luminescence scale. The drastic  
316 difference in luminescence resulted in oversaturation of signal in WT mice placed on the KO  
317 scale (Fig. S3A). Conversely, there was an absence of signal in KO mice placed on the WT scale  
318 at 10 and 24 h post-infection, further demonstrating the significant improvement in bacterial  
319 burdens in pups that cannot respond to IL-27 (Fig. 6A). Peak luminescent signal was observed at  
320 10 h post-infection in KO pups, indicating that bacterial replication was controlled at this point in  
321 the infection (Fig. 6B and S3B). In contrast, the luminescence measured at 10 h in WT pups was  
322 increased relative to KO pups and continued to increase through 24 h (Fig. 6B and S3B). The  
323 final signal intensity at 24 h was nearly four orders of magnitude higher in WT pups (Fig. 6B,  
324 6C, and S3B). This real time imaging analysis also uncovered the brain as a site for high levels  
325 of bacteria in WT animals (Fig. 6C and S4). This finding was not unexpected since *E. coli* K1,  
326 including our strain, is a leading cause of neonatal meningitis (41, 42). However, the magnitude  
327 of difference between WT and KO pups was striking. In the absence of IL-27 signaling, there

328 was a significant reduction in luminescent signal and CFUs in the brain (Fig. 6C and S4).  
329 Overall, the change in luminescence amongst mice correlated with actual CFUs in tissues and  
330 blood of WT and KO mice following imaging at 24 h (Fig. 6C).

331 ***WSX-1<sup>-/-</sup> mice exhibit reduced levels of inflammation during infection.*** Failure to  
332 control bacterial replication promotes excessive and pathological inflammation during sepsis. As  
333 such, we evaluated gene expression levels of inflammatory cytokines in the spleens following  
334 one day of parallel infection in WT and KO neonates. This time point was chosen to evaluate  
335 pups during the critical phase; later time points would fail to include pups that succumb to  
336 infection and enrich the data set with findings from animals that exhibit improved outcomes.  
337 Gene expression levels were expressed relative to uninfected controls for WT and KO mice  
338 separately. WT levels of TNF- $\alpha$ , IL-1, and IL-6 increased robustly in WT pups following  
339 infection, while TNF- $\alpha$  and IL-6 expression were significantly reduced in WSX-1<sup>-/-</sup> pups (Fig.  
340 7A). Although there was a trend of reduced IL-1 expression in KO pups, this finding did not  
341 reach statistical significance (Fig. 7A). The levels of serum cytokines followed a similar pattern  
342 (Fig. 7B). IL-6 levels increased dramatically in infected WT pups and were maintained at a level  
343 two orders of magnitude lower in KO pups, while TNF- $\alpha$  and IL-1 levels were reduced  
344 approximately ten-fold (Fig. 7B). IL-6 levels are increased in patients with infectious  
345 complications and used clinically to provide a quantitative assessment of sepsis severity (43-45).  
346 Additionally, IL-6 levels correlate with the mortality rate in septic patients (46). The striking  
347 difference in IL-6 serum concentrations are reflective of peak illness in WT mice and a condition  
348 that is improved in mice that do not respond to IL-27 (47, 48).

349



## 350 **DISCUSSION**

351           We have established elevated levels of the immune suppressive cytokine IL-27 at resting  
352 state in neonates, and we further demonstrate here that those levels continue to rise in most  
353 neonatal pups following infection that leads to sepsis. Our data regarding IL-27 serum levels are  
354 consistent with related findings in septic adult humans. Adult septic patients exhibit increased  
355 levels of IL-27 transcripts in whole blood and higher levels of serum cytokine (49). However, the  
356 absence of IL-27 data prior to infection limits our understanding of whether septic individuals  
357 are predisposed to higher IL-27 levels that constitute a risk factor for infection, or are elevated as  
358 a consequence of infection. Our model addresses this question specifically in neonates with  
359 littermates from inbred mice. Our findings have both parallels and contrasts with adult mice that  
360 become septic following caecal ligation and puncture (CLP) for which there is IL-27-related  
361 data. In these models, splenic IL-27 transcripts rise early peaking at 6-12 h, and protein levels are  
362 high in serum at 24 h (49-51). The greatest abundance of IL-27p28 transcripts at 6 h was found  
363 in the spleen and lungs (49-51). Our analysis identified the greatest increase in IL-27p28 and  
364 EB13 transcripts during early infection in the lungs and kidneys of septic neonates. Later in the  
365 infection at 24 h, IL-27 transcripts were more widely increased across different tissues. In  
366 contrast to our neonatal data, adult mice maintain high levels of serum IL-27 through 72 h (49).  
367 Peak IL-27 serum levels at 24 h during neonatal infection may be influenced by the nature of the  
368 model and critical window for survival. We are the first to profile IL-27-producing cells in the  
369 blood and tissues during septic infection of any age group. Bosmann and colleagues depleted  
370 macrophages by clodronate treatment and observed a significant decline in IL-27 in the blood  
371 during endotoxic shock (51). Our analysis of IL-27-producing myeloid cells in the spleen and  
372 blood revealed Gr-1<sup>+</sup> and F4/80<sup>+</sup> cells as the most abundant source of cytokine. Neither of these

373 surface markers is exclusive to a particular cell type. Gr-1 is expressed on MDSCs, some  
374 monocyte and macrophage populations, and at a high level on granulocytes (52-54). We recently  
375 described MDSCs as a significant source of IL-27 (12), and it is tempting to speculate that these  
376 cells are a significant source of rising levels during infection. F4/80 is expressed on monocytes,  
377 macrophages, and eosinophils (55, 56). An unexpected finding was that the frequency of these  
378 cells was not increased in septic pups. However, the mean fluorescent intensity of IL-27<sup>+</sup> cells  
379 demonstrated that some cells elevated their level of cytokine production at different times during  
380 infection. This was true of all myeloid populations examined in the spleen. The increased IL-27  
381 level in CD115<sup>+</sup> cells was especially dramatic at 10 h post-infection. Our cellular profiling  
382 focused on myeloid cells, which are considered the dominant cellular sources of IL-27 (57).  
383 However, we cannot rule out other cellular sources that make a contribution to the overall levels  
384 of IL-27 produced during infection. Endothelial and epithelial cells have been reported to express  
385 both IL-27 subunits (15, 57). Contributions from these cells may help to explain the high levels  
386 of IL-27 expression observed in our model in the kidney, a tissue with extensive vasculature.

387         The presence of IL-27 in infected neonates in our system correlates with a significant  
388 increase in bacterial burdens and mortality. We have previously reported that IL-27 interferes  
389 with lysosomal acidification and trafficking in macrophages. This promotes increased growth of  
390 intracellular and extracellular pathogens (11, 27, 30, 31). Similarly, we recently reported that  
391 MDSC-derived IL-27 opposes control of *E. coli* by macrophages (12). In this report, we  
392 demonstrated improved clearance of bacteria by Ly6B.2<sup>+</sup> myeloid cells and bone marrow  
393 derived macrophages from WSX-1<sup>-/-</sup> pups. It is likely that the previously reported influence of  
394 IL-27 on lysosomal activity is directly responsible for enhanced killing of *E. coli* shown here  
395 (30, 31). Furthermore, since survival from sepsis in murine neonates does not depend on an

396 intact adaptive immune system (58), the improved innate immune cell mediated clearance of  
397 bacteria in the absence of IL-27 is likely critical to the improved mortality in those neonatal  
398 pups. Lower levels of inflammatory cytokines in WSX-1-deficient neonates during infection is  
399 consistent with reduced bacterial burdens. Bacteria and bacterial-derived products drive the  
400 pathological inflammatory response during sepsis. Less inflammation in the absence of IL-27  
401 may seem counterintuitive given many literature precedents, but our results suggest that the  
402 direct influence of IL-27 on bacterial killing by phagocytes is the dominant mechanism that  
403 dictates outcomes during neonatal sepsis. This implies that the greater numbers of circulating  
404 bacteria in WT pups drives an enhanced inflammatory response due to this negative influence of  
405 IL-27 on phagocyte clearance. Similarly, reduced concentrations of inflammatory cytokines and  
406 chemokines were found in the blood in adult mice given an IL-27 neutralizing antibody during  
407 endotoxic shock and in the lungs of WSX-1<sup>-/-</sup> adult mice during a CLP-induced impairment of  
408 secondary bacterial challenge (49, 51). Fang and colleagues demonstrated that IL-27  
409 neutralization reduced pulmonary inflammation in a mouse model of CLP-induced lung injury  
410 (59). It is also important to consider a possible effect of IL-27 on endothelial cells. IL-27 has  
411 been implicated in the endothelial dysfunction that occurs during cardiovascular pathology  
412 central to atherosclerosis by stimulating inflammatory cytokine and chemokine expression (60).  
413 Furthermore, IL-27 increased production of IL-6 and an inflammatory chemokine cascade in  
414 human endothelial cells (61, 62). This highlights the double-edge sword nature of IL-27. IL-27  
415 has also been shown to activate an inflammatory response and suppress IL-10 production in  
416 monocytes (32). These cells would be expected to be significant players in the innate immune  
417 response during bacterial sepsis.

418           The intravital imaging analysis further supports the conclusion that IL-27 opposes  
419 bacterial clearance and allowed us to observe the rapid progression of dissemination that occurs  
420 in WT pups. To our knowledge, this is the first time bacterial sepsis has been imaged intravitaly  
421 in neonatal mice. To this point, studies on sepsis in the context of LPS, group B streptococci, or  
422 *E. coli* in neonates have utilized confocal imaging of fixed tissue sections for analysis of  
423 bacterial load and inflammation (63-65). The presence of bacteria in the brain further validates  
424 our model as one that recapitulates findings clinically relevant in human neonates infected with  
425 *E. coli* K1 (41, 42). Our study represents a novel approach to understanding bacterial  
426 dissemination in a neonatal model relative to the host response, and drives home a direct  
427 association between IL-27 and severity of infection.

428           Improved infection control in adult mice lacking EBI3 or WSX-1 occurs during both *M.*  
429 *tuberculosis* and *P. aeruginosa* infections or CLP-induced peritonitis (21, 22, 49, 50). However,  
430 this improved infection outcome is in contrast to other studies that demonstrate elimination of  
431 IL-27 results in marked susceptibility to infection from *Trypanosoma cruzi*, *Trichuris muris*,  
432 *Leishmania major*, and *Toxoplasma gondii* (18, 20, 23, 66, 67). The differences in infection  
433 outcome relative to IL-27 suggests a microbe and Th1 vs Th2-dependent mechanism of  
434 immunity, as well as a potential threshold of IL-27 production necessary to modulate proper  
435 immunity. Although IL-27 may serve a beneficial role in the balance of inflammatory response,  
436 in different infectious contexts, over or underproduction of this cytokine may result in immune  
437 dysregulation and pathogen expansion.

438           There were some limitations to our study. Overall, the number of cells that could be  
439 obtained from the blood and spleen were limited. As a result, we could not perform more  
440 extensive profiling of IL-27-producing cells. As mentioned previously, non-myeloid cells may

441 contribute to the total IL-27 levels and may even be undervalued in that regard. Additionally, we  
442 have not developed an approach that allows for blood sampling from viable neonates. As such,  
443 we were unable to follow each pup for IL-27 levels and subsequent bacterial burdens or viability  
444 versus mortality. The technical ability to perform this level of analysis would further strengthen  
445 our conclusions.

446 In summary, our results suggest that elevated levels of IL-27 early in life predispose to  
447 impaired control of pathogen burden further compounded by continued increases in circulating  
448 levels of IL-27 during sepsis. These findings have enormous translational potential. On the  
449 diagnostic front, IL-27 levels in circulation may predict susceptibility to septic infection and  
450 related outcomes. Similarly, IL-27 levels may predict outcomes and guide initiation of antibiotic  
451 therapy in neonates that appear ill. Indeed, IL-27 has been proposed as a biomarker for neonatal  
452 sepsis (37). IL-27 antagonism may also offer therapeutic potential. Our results predict reducing  
453 IL-27 levels will promote bacterial clearance, improve host response, and reduce mortality. This  
454 approach may have prophylactic value for populations at increased risk in addition to a post-  
455 infection therapy. Currently, the only available treatment options to combat bacterial sepsis are  
456 antibiotics and supportive care (68). IL-27 may represent a targeted adjunctive therapy to  
457 augment the efficacy of antibiotics to improve survival and infection-related outcomes in  
458 neonates.

459

## 460 **NOTES & ACKNOWLEDGEMENTS**

461 *Financial support.* This work was supported by West Virginia University Institutional funds.

462 *Conflicts of interest.* The authors declare no competing financial interests.

463

464 **REFERENCES**

- 465 1. Fleischmann-Struzek C, Goldfarb DM, Schlattmann P, Schlapbach LJ, Reinhart K,  
466 Kisson N. 2018. The global burden of paediatric and neonatal sepsis: a systematic  
467 review. *Lancet Respir Med* 6:223-230.
- 468 2. Simonsen KA, Anderson-Berry AL, Delair SF, Davies HD. 2014. Early-onset neonatal  
469 sepsis. *Clin Microbiol Rev* 27:21-47.
- 470 3. Weston EJ, Pondo T, Lewis MM, Martell-Cleary P, Morin C, Jewell B, Daily P, Apostol  
471 M, Petit S, Farley M, Lynfield R, Reingold A, Hansen NI, Stoll BJ, Shane AL, Zell E,  
472 Schrag SJ. 2011. The burden of invasive early-onset neonatal sepsis in the United States,  
473 2005-2008. *Pediatr Infect Dis J* 30:937-41.
- 474 4. Rozanska A, Wojkowska-Mach J, Adamski P, Borszewska-Kornacka M, Gulczynska E,  
475 Nowiczewski M, Helwich E, Kordek A, Pawlik D, Bulanda M. 2015. Infections and risk-  
476 adjusted length of stay and hospital mortality in Polish Neonatology Intensive Care Units.  
477 *Int J Infect Dis* 35:87-92.
- 478 5. Payne NR, Carpenter JH, Badger GJ, Horbar JD, Rogowski J. 2004. Marginal increase in  
479 cost and excess length of stay associated with nosocomial bloodstream infections in  
480 surviving very low birth weight infants. *Pediatrics* 114:348-55.
- 481 6. Adkins B, Leclerc C, Marshall-Clarke S. 2004. Neonatal adaptive immunity comes of  
482 age. *Nature Reviews Immunology* 4:553.
- 483 7. Garcia AM, Fadel SA, Cao S, Sarzotti M. 2000. T cell immunity in neonates. *Immunol*  
484 *Res* 22:177-90.

- 485 8. Sun CM, Fiette L, Tanguy M, Leclerc C, Lo-Man R. 2003. Ontogeny and innate  
486 properties of neonatal dendritic cells. *Blood* 102:585-91.
- 487 9. Basha S, Surendran N, Pichichero M. 2014. Immune responses in neonates. *Expert Rev*  
488 *Clin Immunol* 10:1171-84.
- 489 10. Angelone DF, Wessels MR, Coughlin M, Suter EE, Valentini P, Kalish LA, Levy O.  
490 2006. Innate immunity of the human newborn is polarized toward a high ratio of IL-  
491 6/TNF-alpha production in vitro and in vivo. *Pediatr Res* 60:205-9.
- 492 11. Kraft JD, Horzempa J, Davis C, Jung JY, Pena MM, Robinson CM. 2013. Neonatal  
493 macrophages express elevated levels of interleukin-27 that oppose immune responses.  
494 *Immunology* 139:484-93.
- 495 12. Gleave Parson M, Grimmett J, Vance JK, Witt MR, Seman BG, Rawson TW, Lyda L,  
496 Labuda C, Jung JY, Bradford SD, Robinson CM. 2018. Murine myeloid-derived  
497 suppressor cells are a source of elevated levels of interleukin-27 in early life and  
498 compromise control of bacterial infection. *Immunol Cell Biol* doi:10.1111/imcb.12224.
- 499 13. Kollmann TR, Crabtree J, Rein-Weston A, Blimkie D, Thommai F, Wang XY, Lavoie  
500 PM, Furlong J, Fortuno ES, 3rd, Hajjar AM, Hawkins NR, Self SG, Wilson CB. 2009.  
501 Neonatal innate TLR-mediated responses are distinct from those of adults. *J Immunol*  
502 183:7150-60.
- 503 14. Brook B, Harbeson D, Ben-Othman R, Viemann D, Kollmann TR. 2017. Newborn  
504 susceptibility to infection vs. disease depends on complex in vivo interactions of host and  
505 pathogen. *Semin Immunopathol* 39:615-625.

- 506 15. Devergne O, Hummel M, Koeppen H, Le Beau MM, Nathanson EC, Kieff E, Birkenbach  
507 M. 1996. A novel interleukin-12 p40-related protein induced by latent Epstein-Barr virus  
508 infection in B lymphocytes. *J Virol* 70:1143-53.
- 509 16. Pflanz S, Hibbert L, Mattson J, Rosales R, Vaisberg E, Bazan JF, Phillips JH,  
510 McClanahan TK, de Waal Malefyt R, Kastelein RA. 2004. WSX-1 and glycoprotein 130  
511 constitute a signal-transducing receptor for IL-27. *J Immunol* 172:2225-31.
- 512 17. Hibbert L, Pflanz S, De Waal Malefyt R, Kastelein RA. 2003. IL-27 and IFN-alpha  
513 signal via Stat1 and Stat3 and induce T-Bet and IL-12Rbeta2 in naive T cells. *J Interferon*  
514 *Cytokine Res* 23:513-22.
- 515 18. Villarino A, Hibbert L, Lieberman L, Wilson E, Mak T, Yoshida H, Kastelein RA, Saris  
516 C, Hunter CA. 2003. The IL-27R (WSX-1) is required to suppress T cell hyperactivity  
517 during infection. *Immunity* 19:645-55.
- 518 19. Pflanz S, Timans JC, Cheung J, Rosales R, Kanzler H, Gilbert J, Hibbert L, Churakova T,  
519 Travis M, Vaisberg E, Blumenschein WM, Mattson JD, Wagner JL, To W, Zurawski S,  
520 McClanahan TK, Gorman DM, Bazan JF, de Waal Malefyt R, Rennick D, Kastelein RA.  
521 2002. IL-27, a heterodimeric cytokine composed of EB13 and p28 protein, induces  
522 proliferation of naive CD4+ T cells. *Immunity* 16:779-90.
- 523 20. Hamano S, Himeno K, Miyazaki Y, Ishii K, Yamanaka A, Takeda A, Zhang M, Hisaeda  
524 H, Mak TW, Yoshimura A, Yoshida H. 2003. WSX-1 is required for resistance to  
525 *Trypanosoma cruzi* infection by regulation of proinflammatory cytokine production.  
526 *Immunity* 19:657-67.



- 527 21. Pearl JE, Khader SA, Solache A, Gilmartin L, Ghilardi N, deSavage F, Cooper AM.  
528 2004. IL-27 signaling compromises control of bacterial growth in mycobacteria-infected  
529 mice. *J Immunol* 173:7490-6.
- 530 22. Holscher C, Holscher A, Ruckerl D, Yoshimoto T, Yoshida H, Mak T, Saris C, Ehlers S.  
531 2005. The IL-27 receptor chain WSX-1 differentially regulates antibacterial immunity  
532 and survival during experimental tuberculosis. *J Immunol* 174:3534-44.
- 533 23. Artis D, Villarino A, Silverman M, He W, Thornton EM, Mu S, Summer S, Covey TM,  
534 Huang E, Yoshida H, Koretzky G, Goldschmidt M, Wu GD, de Sauvage F, Miller HR,  
535 Saris CJ, Scott P, Hunter CA. 2004. The IL-27 receptor (WSX-1) is an inhibitor of innate  
536 and adaptive elements of type 2 immunity. *J Immunol* 173:5626-34.
- 537 24. Batten M, Li J, Yi S, Kljavin NM, Danilenko DM, Lucas S, Lee J, de Sauvage FJ,  
538 Ghilardi N. 2006. Interleukin 27 limits autoimmune encephalomyelitis by suppressing the  
539 development of interleukin 17-producing T cells. *Nat Immunol* 7:929-36.
- 540 25. Awasthi A, Carrier Y, Peron JP, Bettelli E, Kamanaka M, Flavell RA, Kuchroo VK,  
541 Oukka M, Weiner HL. 2007. A dominant function for interleukin 27 in generating  
542 interleukin 10-producing anti-inflammatory T cells. *Nat Immunol* 8:1380-9.
- 543 26. Robinson CM, Jung JY, Nau GJ. 2012. Interferon-gamma, tumor necrosis factor, and  
544 interleukin-18 cooperate to control growth of *Mycobacterium tuberculosis* in human  
545 macrophages. *Cytokine* 60:233-41.
- 546 27. Robinson CM, Nau GJ. 2008. Interleukin-12 and interleukin-27 regulate macrophage  
547 control of *Mycobacterium tuberculosis*. *J Infect Dis* 198:359-66.
- 548 28. Robinson CM, O'Dee D, Hamilton T, Nau GJ. 2010. Cytokines involved in interferon-  
549 gamma production by human macrophages. *J Innate Immun* 2:56-65.

- 550 29. Kalliolias GD, Gordon RA, Ivashkiv LB. 2010. Suppression of TNF-alpha and IL-1  
551 signaling identifies a mechanism of homeostatic regulation of macrophages by IL-27. *J*  
552 *Immunol* 185:7047-56.
- 553 30. Jung JY, Robinson CM. 2013. Interleukin-27 inhibits phagosomal acidification by  
554 blocking vacuolar ATPases. *Cytokine* 62:202-5.
- 555 31. Jung JY, Robinson CM. 2014. IL-12 and IL-27 regulate the phagolysosomal pathway in  
556 mycobacteria-infected human macrophages. *Cell Commun Signal* 12:16.
- 557 32. Kalliolias GD, Ivashkiv LB. 2008. IL-27 activates human monocytes via STAT1 and  
558 suppresses IL-10 production but the inflammatory functions of IL-27 are abrogated by  
559 TLRs and p38. *J Immunol* 180:6325-33.
- 560 33. Jung JY, Gleave Parson M, Kraft JD, Lyda L, Kobe B, Davis C, Robinson J, Pena MM,  
561 Robinson CM. 2016. Elevated interleukin-27 levels in human neonatal macrophages  
562 regulate indoleamine dioxygenase in a STAT-1 and STAT-3-dependent manner.  
563 *Immunology* 149:35-47.
- 564 34. Rieber N, Gille C, Kostlin N, Schafer I, Spring B, Ost M, Spieles H, Kugel HA, Pfeiffer  
565 M, Heininger V, Alkhaled M, Hector A, Mays L, Kormann M, Zundel S, Fuchs J,  
566 Handgretinger R, Poets CF, Hartl D. 2013. Neutrophilic myeloid-derived suppressor cells  
567 in cord blood modulate innate and adaptive immune responses. *Clin Exp Immunol*  
568 174:45-52.
- 569 35. Schwarz J, Scheckenbach V, Kugel H, Spring B, Pagel J, Hartel C, Pauluschke-Frohlich  
570 J, Peter A, Poets CF, Gille C, Kostlin N. 2018. Granulocytic myeloid-derived suppressor  
571 cells (GR-MDSC) accumulate in cord blood of preterm infants and remain elevated  
572 during the neonatal period. *Clin Exp Immunol* 191:328-337.

- 573 36. Wong HR, Cvijanovich NZ, Hall M, Allen GL, Thomas NJ, Freishtat RJ, Anas N, Meyer  
574 K, Checchia PA, Lin R, Bigham MT, Sen A, Nowak J, Quasney M, Henricksen JW,  
575 Chopra A, Banschbach S, Beckman E, Harmon K, Lahni P, Shanley TP. 2012.  
576 Interleukin-27 is a novel candidate diagnostic biomarker for bacterial infection in  
577 critically ill children. *Crit Care* 16:R213.
- 578 37. He Y, Du Wx, Jiang Hy, Ai Q, Feng J, Liu Z, Yu JI. 2017. Multiplex Cytokine Profiling  
579 Identifies Interleukin-27 as a Novel Biomarker For Neonatal Early Onset Sepsis. *Shock*  
580 47:140-147.
- 581 38. Hornik CP, Fort P, Clark RH, Watt K, Benjamin DK, Jr., Smith PB, Manzoni P, Jacqz-  
582 Aigrain E, Kaguelidou F, Cohen-Wolkowicz M. 2012. Early and late onset sepsis in  
583 very-low-birth-weight infants from a large group of neonatal intensive care units. *Early*  
584 *Hum Dev* 88 Suppl 2:S69-74.
- 585 39. Lopez CM, Rholl DA, Trunck LA, Schweizer HP. 2009. Versatile dual-technology  
586 system for markerless allele replacement in *Burkholderia pseudomallei*. *Appl Environ*  
587 *Microbiol* 75:6496-503.
- 588 40. Rosas M, Thomas B, Stacey M, Gordon S, Taylor PR. 2010. The myeloid 7/4-antigen  
589 defines recently generated inflammatory macrophages and is synonymous with Ly-6B. *J*  
590 *Leukoc Biol* 88:169-80.
- 591 41. Glode MP, Sutton A, Robbins JB, McCracken GH, Gotschlich EC, Kaijser B, Hanson  
592 LA. 1977. Neonatal meningitis due of *Escherichia coli* K1. *J Infect Dis* 136 Suppl:S93-7.
- 593 42. Yao Y, Xie Y, Kim KS. 2006. Genomic comparison of *Escherichia coli* K1 strains  
594 isolated from the cerebrospinal fluid of patients with meningitis. *Infect Immun* 74:2196-  
595 206.

- 596 43. Du B, Pan J, Chen D, Li Y. 2003. Serum procalcitonin and interleukin-6 levels may help  
597 to differentiate systemic inflammatory response of infectious and non-infectious origin.  
598 *Chin Med J (Engl)* 116:538-42.
- 599 44. Fan SL, Miller NS, Lee J, Remick DG. 2016. Diagnosing sepsis - The role of laboratory  
600 medicine. *Clin Chim Acta* 460:203-10.
- 601 45. Shane AL, Sánchez PJ, Stoll BJ. 2017. Neonatal sepsis. *The Lancet* 390:1770-1780.
- 602 46. Kellum JA, Kong L, Fink MP, Weissfeld LA, Yealy DM, Pinsky MR, Fine J, Krichevsky  
603 A, Delude RL, Angus DC. 2007. Understanding the inflammatory cytokine response in  
604 pneumonia and sepsis: results of the Genetic and Inflammatory Markers of Sepsis  
605 (GenIMS) Study. *Arch Intern Med* 167:1655-63.
- 606 47. Ng PC, Li K, Wong RP, Chui K, Wong E, Li G, Fok TF. 2003. Proinflammatory and  
607 anti-inflammatory cytokine responses in preterm infants with systemic infections. *Arch*  
608 *Dis Child Fetal Neonatal Ed* 88:F209-13.
- 609 48. Procianoy RS, Silveira RC. 2004. The role of sample collection timing on interleukin-6  
610 levels in early-onset neonatal sepsis. *J Pediatr (Rio J)* 80:407-10.
- 611 49. Cao J, Xu F, Lin S, Song Z, Zhang L, Luo P, Xu H, Li D, Zheng K, Ren G, Yin Y. 2014.  
612 IL-27 controls sepsis-induced impairment of lung antibacterial host defence. *Thorax*  
613 69:926-37.
- 614 50. Wirtz S, Tubbe I, Galle PR, Schild HJ, Birkenbach M, Blumberg RS, Neurath MF. 2006.  
615 Protection from lethal septic peritonitis by neutralizing the biological function of  
616 interleukin 27. *J Exp Med* 203:1875-81.
- 617 51. Bosmann M, Russkamp NF, Strobl B, Roewe J, Balouzian L, Pache F, Radsak MP, van  
618 Rooijen N, Zetoune FS, Sarma JV, Nunez G, Muller M, Murray PJ, Ward PA. 2014.

- 619 Interruption of macrophage-derived IL-27(p28) production by IL-10 during sepsis  
620 requires STAT3 but not SOCS3. *J Immunol* 193:5668-77.
- 621 52. Gabrilovich DI, Nagaraj S. 2009. Myeloid-derived suppressor cells as regulators of the  
622 immune system. *Nat Rev Immunol* 9:162-74.
- 623 53. Hammond MD, Ai Y, Sansing LH. 2012. Gr1+ Macrophages and Dendritic Cells  
624 Dominate the Inflammatory Infiltrate 12 Hours After Experimental Intracerebral  
625 Hemorrhage. *Transl Stroke Res* 3:s125-s131.
- 626 54. Fleming TJ, Fleming ML, Malek TR. 1993. Selective expression of Ly-6G on myeloid  
627 lineage cells in mouse bone marrow. RB6-8C5 mAb to granulocyte-differentiation  
628 antigen (Gr-1) detects members of the Ly-6 family. *J Immunol* 151:2399-408.
- 629 55. Dos Anjos Cassado A. 2017. F4/80 as a Major Macrophage Marker: The Case of the  
630 Peritoneum and Spleen. *Results Probl Cell Differ* 62:161-179.
- 631 56. McGarry MP, Stewart CC. 1991. Murine eosinophil granulocytes bind the murine  
632 macrophage-monocyte specific monoclonal antibody F4/80. *J Leukoc Biol* 50:471-8.
- 633 57. Hall AO, Silver JS, Hunter CA. 2012. The immunobiology of IL-27. *Adv Immunol*  
634 115:1-44.
- 635 58. Wynn JL, Scumpia PO, Winfield RD, Delano MJ, Kelly-Scumpia K, Barker T, Ungaro  
636 R, Levy O, Moldawer LL. 2008. Defective innate immunity predisposes murine neonates  
637 to poor sepsis outcome but is reversed by TLR agonists. *Blood* 112:1750-8.
- 638 59. Xu F, Liu Q, Lin S, Shen N, Yin Y, Cao J. 2013. IL-27 is elevated in acute lung injury  
639 and mediates inflammation. *J Clin Immunol* 33:1257-68.

- 640 60. Dorosz SA, Ginolhac A, Kahne T, Naumann M, Sauter T, Salsmann A, Bueb JL. 2015.  
641 Role of Calprotectin as a Modulator of the IL27-Mediated Proinflammatory Effect on  
642 Endothelial Cells. *Mediators Inflamm* 2015:737310.
- 643 61. Feng XM, Chen XL, Liu N, Chen Z, Zhou YL, Han ZB, Zhang L, Han ZC. 2007.  
644 Interleukin-27 upregulates major histocompatibility complex class II expression in  
645 primary human endothelial cells through induction of major histocompatibility complex  
646 class II transactivator. *Hum Immunol* 68:965-72.
- 647 62. Qiu HN, Liu B, Liu W, Liu S. 2016. Interleukin-27 enhances TNF-alpha-mediated  
648 activation of human coronary artery endothelial cells. *Mol Cell Biochem* 411:1-10.
- 649 63. Lieblein-Boff JC, McKim DB, Shea DT, Wei P, Deng Z, Sawicki C, Quan N, Bilbo SD,  
650 Bailey MT, McTigue DM, Godbout JP. 2013. Neonatal *E. coli* infection causes neuro-  
651 behavioral deficits associated with hypomyelination and neuronal sequestration of iron. *J*  
652 *Neurosci* 33:16334-45.
- 653 64. Cardoso FL, Herz J, Fernandes A, Rocha J, Sepodes B, Brito MA, McGavern DB, Brites  
654 D. 2015. Systemic inflammation in early neonatal mice induces transient and lasting  
655 neurodegenerative effects. *J Neuroinflammation* 12:82.
- 656 65. Andrade EB, Magalhaes A, Puga A, Costa M, Bravo J, Portugal CC, Ribeiro A, Correia-  
657 Neves M, Faustino A, Firon A, Trieu-Cuot P, Summavielle T, Ferreira P. 2018. A mouse  
658 model reproducing the pathophysiology of neonatal group B streptococcal infection. *Nat*  
659 *Commun* 9:3138.
- 660 66. Artis D, Johnson LM, Joyce K, Saris C, Villarino A, Hunter CA, Scott P. 2004. Cutting  
661 edge: early IL-4 production governs the requirement for IL-27-WSX-1 signaling in the

- 662 development of protective Th1 cytokine responses following *Leishmania major* infection.  
663 *J Immunol* 172:4672-5.
- 664 67. Robinson KM, Lee B, Scheller EV, Mandalapu S, Enelow RI, Kolls JK, Alcorn JF. 2015.  
665 The role of IL-27 in susceptibility to post-influenza *Staphylococcus aureus* pneumonia.  
666 *Respir Res* 16:10.
- 667 68. The INIS Study collaborative group. 2008. The INIS Study. International Neonatal  
668 Immunotherapy Study: non-specific intravenous immunoglobulin therapy for suspected  
669 or proven neonatal sepsis: an international, placebo controlled, multicentre randomised  
670 trial. *BMC Pregnancy Childbirth* 8:52.

## 671 **FIGURE LEGENDS**

672 **Figure 1: IL-27 levels rise during neonatal sepsis.** Neonatal mice were subcutaneously  
673 inoculated with a target inoculum of  $\sim 2 \times 10^6$  CFUs/mouse of *E. coli* O1:K1:H7 or PBS as a  
674 control on day 3 or 4 of life. **(A, B)** At 10 **(A)** or 24 h **(B)** post-infection, the spleen, lung, kidney,  
675 and liver, and brain were harvested and RNA isolated. The expression of IL-27 p28 or EB13 in  
676 infected tissues was determined relative to controls by real time PCR. Each symbol represents an  
677 individual animal finding with the mean for each group displayed. An individual experiment  
678 representative of two with similar results is shown. **(A, B)** To assess IL-27 gene expression,  
679 non-parametric Mann Whitney U-Tests were performed on  $\Delta$ Ct values in control and infected  
680 samples for each tissue IL-27p28 and EB13 at 10 and 24 h. The threshold for statistical  
681 significance was set to 0.05. Data are graphically represented as  $\text{Log}_2$  change in gene expression  
682 relative to control. Analyses revealed statistically significant changes in p28 gene expression in  
683 infected relative to control samples at 10 h in the kidney, liver, lung, and spleen ( $p < 0.0001$ ,  
684  $p < 0.0001$ ,  $p < 0.0001$ , and  $p = 0.0449$ , respectively), and at 24 h in the kidney ( $p < 0.0004$ ) and lung

685 (p<0.0001). Analyses revealed statistically significant differences in EBI3 gene expression in  
686 infected relative to control samples at 10 h in the kidney, lung, and spleen (p<0.0001, p<0.0001,  
687 and p=0.0083, respectively), and at 24 h in the brain (p=0.0321), kidney (p<0.0001), lung  
688 (p<0.0001), and spleen (p=0.0321). (C) Blood was collected from mice at day 1 or 2 post-  
689 infection and serum levels of IL-27 were measured by luminescent immunoassay. Statistical  
690 significance in the 95% confidence interval was determined using a Mann-Whitney U-Test;  
691 exact p values shown.

692

693 **Figure 2: Cellular profiling of IL-27 producers in the spleen.** Neonatal C57BL/6 (WT) mice  
694 were subcutaneously inoculated with a target inoculum of  $\sim 2 \times 10^6$  CFUs/mouse of *E. coli*  
695 O1:K1:H7 or PBS as a control on day 3 or 4 of life. At 10 or 24 h post-infection, mice were  
696 sacrificed and spleens were harvested. Single cell suspensions of splenocytes were  
697 immunolabeled for cell surface markers Gr-1, F4/80, CD11c, or CD115 and intracellular IL-27.  
698 Cells were analyzed by flow cytometry. Figures represent combined results from 2-3  
699 independent experiments. (A) Representative dot plots of splenocytes labeled at 10 h post-  
700 infection for the indicated marker are shown. Cell surface markers are on the y-axis and IL-27  
701 signal is on the x-axis represent. (B) The percentage double positive (upper right quadrant) of the  
702 population for each cell surface marker in control (CT) and *E. coli*-infected (Ifx) spleens at 10  
703 (B) or 24 h (D) post-infection. (C) Percent change in mean fluorescence intensity (MFI) of FITC  
704 signal that corresponds to IL-27 protein in the double positive population for infected relative to  
705 control cells at 10 h (C) or 24 h (E) post-infection. (B, D) Statistical assessment was performed  
706 using a one-way ANOVA with Dunnett's multiple comparison test. Means  $\pm$  standard error are  
707 displayed. (C, E) Mean changes  $\pm$  standard error in absolute values of MFI cell surface marker



708 percentages at 10 h (C) and 24 h (E) post-infection in splenocytes were analyzed relative to a  
709 normalized baseline within the control groups using individual, unpaired t-tests for each cell  
710 surface marker. Asterisks indicate significant differences between infected and control  
711 splenocytes at 10 h (C) post-infection; Gr1 ( $p=0.0003$ ), F4/80 ( $p=0.0027$ ), CD11c ( $p=0.0237$ ),  
712 and CD115 ( $p<0.0001$ ). At 24 h (E) post-infection the asterisk indicates significance for CD11c  
713 ( $p=0.0111$ ). Results shown for Gr-1 ( $p=0.08$ ) and F4/80 ( $p=0.0689$ ) were trending toward  
714 significance.

715

716 **Figure 3: Cellular profiling of IL-27 producers in the blood.** Neonatal C57BL/6 (WT) mice  
717 were subcutaneously inoculated with a target inoculum of  $\sim 2 \times 10^6$  CFUs/mouse of *E. coli*  
718 O1:K1:H7 or PBS as a control on day 3 or 4 of life. At 10 or 24 h post-infection, mice were  
719 sacrificed and blood was harvested and pooled for control and infected pups. PBMCs obtained  
720 by Ficoll density gradient centrifugation were immunolabeled for cell surface markers Gr-1,  
721 F4/80, CD11c, or CD115 and intracellular IL-27. Cells were analyzed by flow cytometry.  
722 Figures represent combined results from 2-3 independent experiments. (A) Representative dot  
723 plots of infected splenocytes at 10 h post-infection labeled for the indicated marker are shown.  
724 Cell surface markers are on the y-axis and IL-27 signal is on the x-axis represent. (B) The  
725 percentage double positive (upper right quadrant) of the population for each cell surface marker  
726 in control (CT) and *E. coli*-infected (Ifx) spleens at 10 h (B) or 24 h (D) post-infection. (C)  
727 Percent change in mean fluorescence intensity (MFI) of FITC signal that corresponds to IL-27  
728 protein in the double positive population for infected relative to control cells at 10 h (C) or 24 h  
729 (E) post-infection. (B, D) Statistical assessment was performed using a one-way ANOVA with  
730 Dunnett's multiple comparison test. Mean changes  $\pm$  standard error are displayed. (C, E) Mean

731 changes  $\pm$  standard error in absolute values of MFI cell surface marker percentages at 10 h (C)  
732 and 24 h (E) post-infection in splenocytes were analyzed relative to a normalized baseline within  
733 the control groups using individual, unpaired t-tests for each cell surface marker. Asterisks  
734 indicate significant differences between infected and control splenocytes at 10 h (C) post-  
735 infection; Gr1 ( $p=0.0119$ ) and F4/80 ( $p=0.0056$ ). Results shown for CD11c ( $p=0.0850$ ) at 10 h  
736 post-infection were trending toward significance. At 24 h (E) post-infection the asterisk indicates  
737 significance for CD11c ( $p=0.0345$ ).

738

739 **Figure 4: IL-27 promotes mortality and poor weight gain during neonatal sepsis.** Neonatal  
740 C57BL/6 (WT) and WSX-1<sup>-/-</sup> (KO) mice were subcutaneously inoculated with a LD<sub>50</sub> dose of *E.*  
741 *coli* O1:K1:H7 or PBS as a control on day 3 or 4 of life and monitored daily for morbidity and  
742 mortality during infection. Three combined experiments for WT (n = 14) and KO (n=15) mice  
743 infected in parallel are shown. (A) Kaplan-Meier survival curves for WT and WSX-1<sup>-/-</sup> mice over  
744 four days of infection. Statistical analysis was performed using the Mantel-Cox log rank test;  
745 exact p-value shown. (B) Recorded mean daily weight (g)  $\pm$  SE for control and infected mice  
746 from WT (left) and WSX-1<sup>-/-</sup> (right) in panel A above. A two-way ANOVA was used to  
747 determine statistical significance between control and *E. coli*-infected pups within the WT and  
748 WSX-1<sup>-/-</sup> groups; an asterisk indicates  $p \leq 0.0001$ . (C) To compare WT and KO weight gain  
749 directly, the percent change for the infected pups relative to the control pups was represented for  
750 each day. A two-way ANOVA and Bonferroni multiple comparisons test was used to determine  
751 statistical significance between WT and KO groups; \* indicates  $p \leq 0.0141$ , \*\*\* indicates  
752  $p \leq 0.0001$ , \*\*\*\*  $p \leq 0.0003$ .

753

754 **Figure 5: IL-27 signaling opposes host clearance of bacteria during neonatal sepsis.**

755 (A) Neonatal C57BL/6 (WT) and *WSX-1*<sup>-/-</sup> (KO) mice were subcutaneously inoculated with a  
756 target inoculum of ~2x10<sup>6</sup> CFUs/mouse of *E. coli* O1:K1:H7 or saline as a control on day 3 or 4  
757 of life. Peripheral tissues (spleen, liver, kidney) and blood were collected at 24 h post-infection  
758 and bacteria enumerated by standard plate counts. Colony forming units (CFUs)/mL for  
759 individual animals and experimental group means are shown for two combined experiments.  
760 Statistical significance in the 95% confidence interval was determined using a Mann-Whitney  
761 test; exact p-values shown. (B, D) Ly6B.2<sup>+</sup> cells were isolated from the spleens of C57BL/6  
762 (WT) and *WSX-1*<sup>-/-</sup> (KO) neonatal mice. (C, E) Macrophages were derived from bone marrow  
763 progenitors obtained from C57BL/6 (WT) and *WSX-1*<sup>-/-</sup> (KO) neonatal mice. (B-E) Cells were  
764 seeded in 96-well plates, and infected with luciferase-expressing *E. coli* O1:K1:H7 at an MOI of  
765 50. After 1 h, the media was replaced with fresh that contained gentamicin (100 µg/mL). (B, C)  
766 Luminescence (RLU) was measured at 3 and 6 h post-infection. (D, E) Culture supernatants  
767 were collected at the indicated time and TNF-α measured by ELISA. (B-E) Mean findings ± SE  
768 for an individual experiment representative of multiple are shown. Statistical significance in the  
769 95% confidence interval was determined using a two-way ANOVA and Bonferroni's multiple  
770 comparisons test; exact p-values shown.

771

772 **Figure 6: Intravital longitudinal imaging of the influence of IL-27 during neonatal sepsis.**

773 Neonatal C57BL/6 (WT) and *WSX-1*<sup>-/-</sup> (KO) mice were subcutaneously inoculated with ~2x10<sup>6</sup>  
774 CFUs/mouse of luciferase-expressing *E. coli* O1:K1:H7 or PBS as a control on day 4 of life in  
775 parallel. The neonatal pups were imaged longitudinally on an IVIS SpectrumCT at 0, 4, 10, and  
776 24 hours post-infection (hpi). Each mouse was tail-tattooed for individual identification during

777 imaging. Data is the result of an independent experiment (WT n=5, KO n=3) representative of  
778 two with similar results. **(A)** Luminescent images of representative WT and KO mice at 0, 4, 10,  
779 and 24 hpi. The signal shown is on the WT scale. Colorimetric scale: low (minimum) signal is  
780 blue, intermediate signal is green, high (maximum) signal is red. **(B)** Total luminescent flux in  
781 photons/second for individual mice at 0, 4, 10, and 24 hpi. **(C)** At 24 hpi, mice were sacrificed  
782 and blood and peripheral tissues were collected for enumeration of bacteria by standard plate  
783 counts. Total luminescent flux (photons/second) and CFUs/mL from each tissue for individually  
784 infected mice are shown.

785

786 **Figure 7: WSX-1<sup>-/-</sup> mice exhibit reduced levels of inflammation during infection.** Neonatal  
787 C57BL/6 (WT) and WSX-1<sup>-/-</sup> (KO) mice were subcutaneously inoculated with a target inoculum  
788 of  $\sim 2 \times 10^6$  CFUs/mouse of *E. coli* O1:K1:H7 or PBS as a control on day 3 or 4 of life. **(A)**  
789 Spleens were harvested 1 day post-infection and RNA isolated. The expression of TNF- $\alpha$ , IL-1,  
790 and IL-6 were determined relative to controls by real time PCR. Individual animal findings and  
791 group means are shown for two combined experiments. Statistical significance in the 95%  
792 confidence interval was determined using individual t tests; exact p-values shown. **(B)** Blood was  
793 collected from mice at day 1 post-infection and serum levels of the indicated cytokine were  
794 measured by multiplex immunoassay. Individual animal findings and group means are shown for  
795 two combined experiments. Statistical significance in the 95% confidence interval was  
796 determined using a Mann-Whitney test; exact p-values shown.

797

798 **Supplemental Figure 1: Cellular profiling of IL-27 producers in the spleen.** Neonatal  
799 C57BL/6 (WT) mice were subcutaneously inoculated with a target inoculum of  $\sim 2 \times 10^6$   
800 CFUs/mouse of *E. coli* O1:K1:H7 or PBS as a control on day 3 or 4 of life. At 10 or 24 h post-  
801 infection, mice were sacrificed and spleens were harvested. Single cell suspensions of  
802 splenocytes were immunolabeled for cell surface markers Gr-1, F4/80, CD11c, or CD115 and  
803 intracellular IL-27. Cells were analyzed by flow cytometry. Results from control pups at 10 h  
804 (A) or 24 h (B) are shown. (C) Results from infected pups at 24 h; 10 h dot plots were shown in  
805 Figure 2.

806

807 **Supplemental Figure 2: Cellular profiling of IL-27 producers in the blood.** Neonatal  
808 C57BL/6 (WT) mice were subcutaneously inoculated with a target inoculum of  $\sim 2 \times 10^6$   
809 CFUs/mouse of *E. coli* O1:K1:H7 or PBS as a control on day 3 or 4 of life. At 10 or 24 h post-  
810 infection, mice were sacrificed and blood was collected. Single cell suspensions of PBMCs were  
811 immunolabeled for cell surface markers Gr1, F4/80, CD11c, or CD115 and intracellular IL-27.  
812 Cells were analyzed by flow cytometry. Results from control pups at 10 h (A) or 24 h (B) are  
813 shown. (C) Results from infected pups at 24 h; 10 h dot plots were shown in Figure 3.

814

815 **Supplemental Figure 3: Intravital longitudinal imaging of the influence of IL-27 during**  
816 **neonatal sepsis requires separate scales for WT and WSX-1<sup>-/-</sup> mice.**

817 Neonatal C57BL/6 (WT) and WSX-1<sup>-/-</sup> (KO) mice were subcutaneously inoculated with a target  
818 inoculum of  $\sim 2 \times 10^6$  CFUs/mouse of luminescent *E. coli* O1:K1:H7 and imaged longitudinally on  
819 an IVIS SpectrumCT at 0, 4, 10, and 24 hours post-infection (hpi). Each mouse was tail-

820 tattooed for individual identification during imaging. At 24 hpi, mice were sacrificed, blood was  
821 collected for serum and bacterial burdens, and peripheral tissues were homogenized for bacterial  
822 burdens. **(A and B)** Data is the result of one independent experiment.  $n = 5$  and  $3$  for wildtype  
823 and WSX-1 deficient mice, respectively. **(A)** Longitudinal luminescence images of  
824 representative wildtype and WSX-1 deficient mice at 0, 4, 10, and 24 hpi. Signal is on the KO  
825 scale. Colorimetric scale: low (minimum) signal is blue, intermediate signal is green, high  
826 (maximum) signal is red. **(B)** Pooled bacterial luminescence signal (total flux) represented as  
827 photons/second for wildtype and WSX-1 deficient mice at 4, 10, and 24 hpi. Black circle  
828 symbols represent each individual mouse in wildtype infections, black square symbols represent  
829 each individual mouse in knockout infections. Statistical analysis of **(B)** was carried out using a  
830 nonparametric Mann-Whitney U test, median with interquartile range displayed.  $* = p \leq 0.05$ .

831

832 **Supplemental Figure 4: Intravital imaging reveals the brain as an organ associated with**  
833 **high bacterial burdens during sepsis.**

834 Neonatal C57BL/6 (WT) and WSX-1<sup>-/-</sup> (KO) mice were subcutaneously inoculated with a target  
835 inoculum of  $\sim 2 \times 10^6$  CFUs/mouse of luminescent *E. coli* O1:K1:H7 and imaged longitudinally on  
836 an IVIS SpectrumCT at 24 hours post-infection (hpi). Images are representative of 2 individual  
837 experiments. **(A)** Representative CT images of two WT mice with bacterial infection in their  
838 brains. Signal is on the wildtype (WT) scale. **(B)** Representative CT images of one KO mouse  
839 with bacterial infection in the brain. Signal is on the knockout (KO) scale. Perspective (x, y, z),  
840 coronal (x, y), and transaxial (x, z) views are shown from 3D CT images for both WT and KO  
841 mice. Colorimetric scale: low (minimum) signal is blue, intermediate signal is green, high  
842 (maximum) signal is red. White arrowheads directly point to burdens in brains.

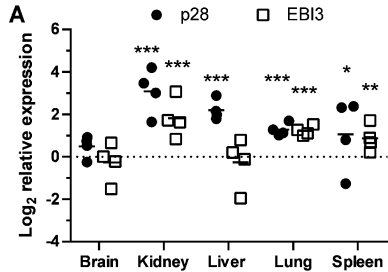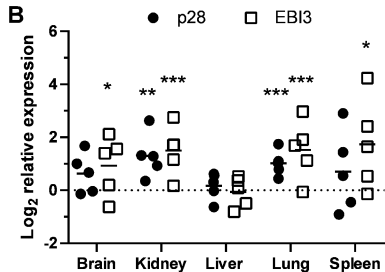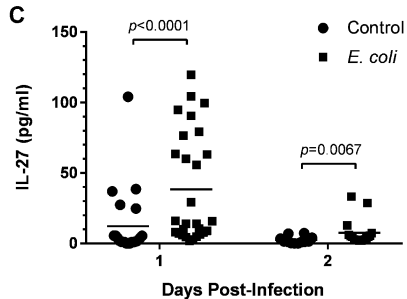

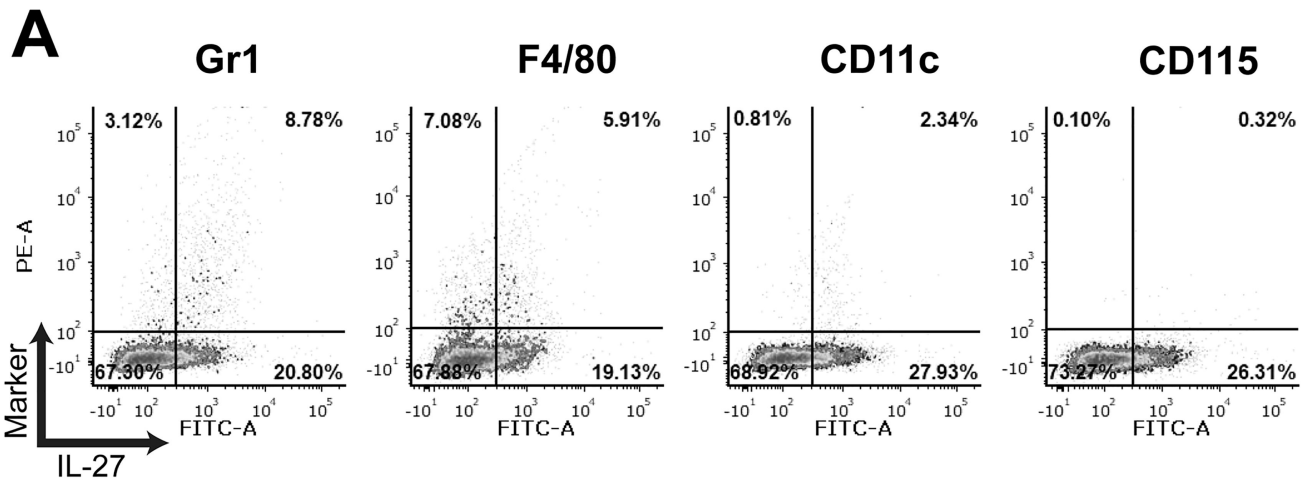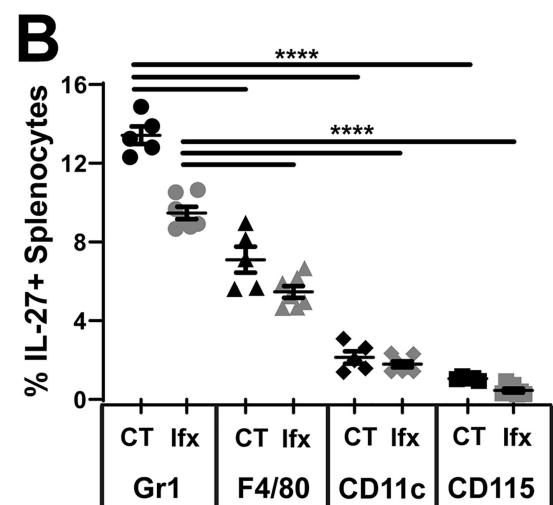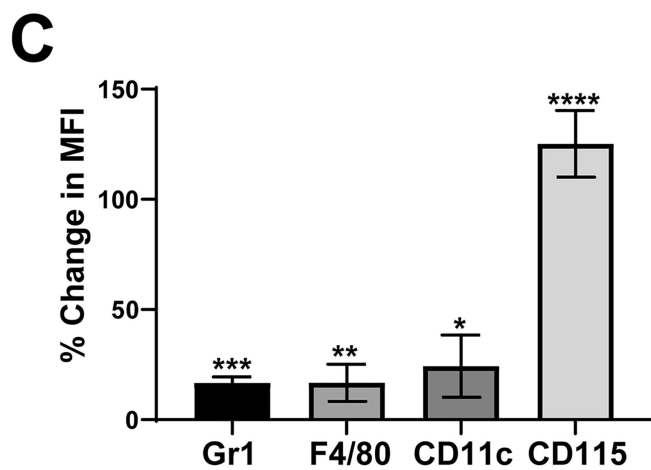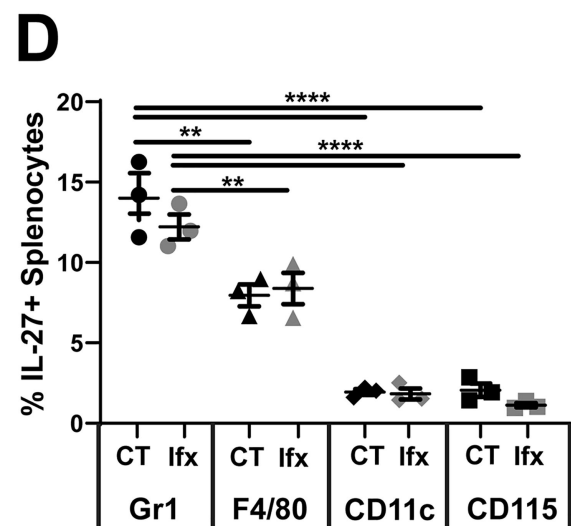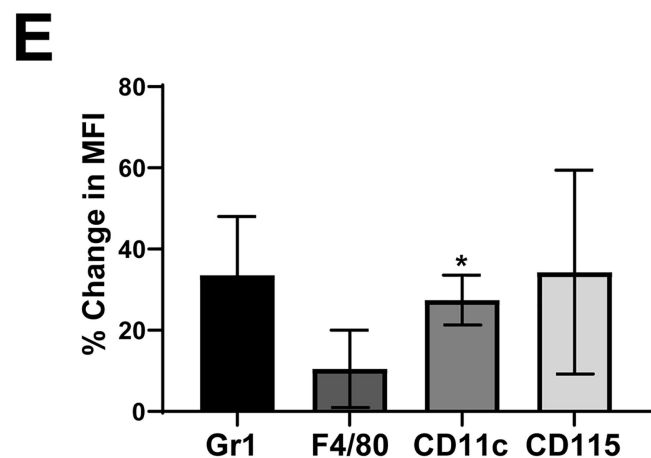



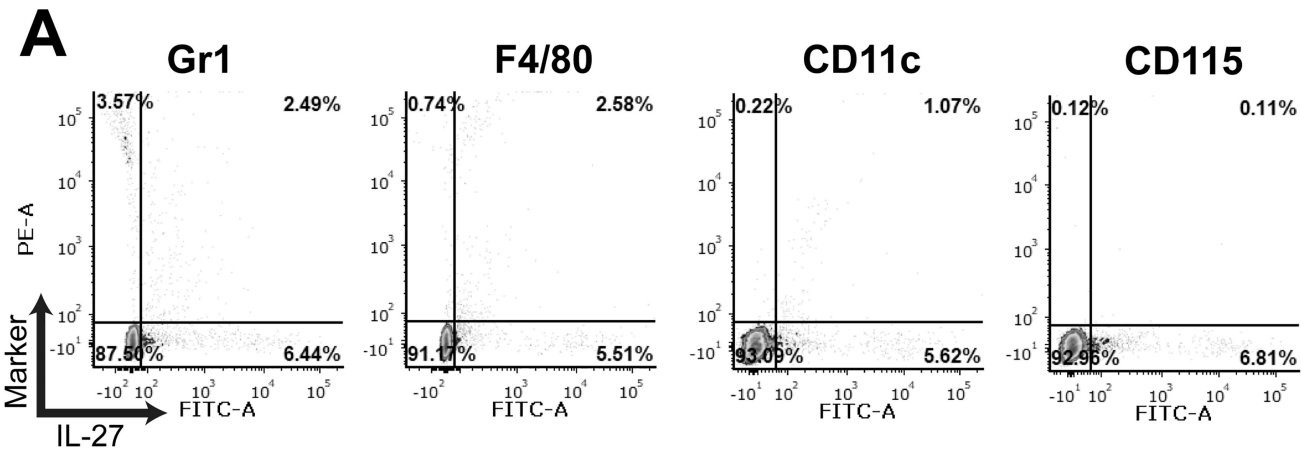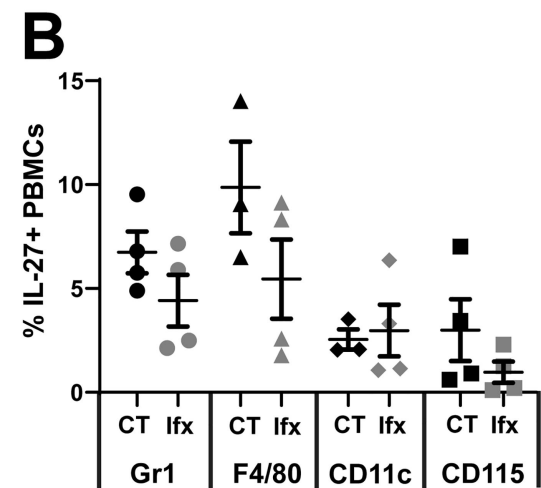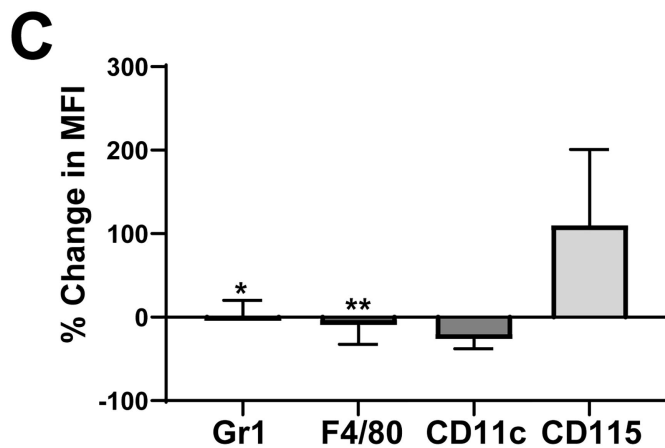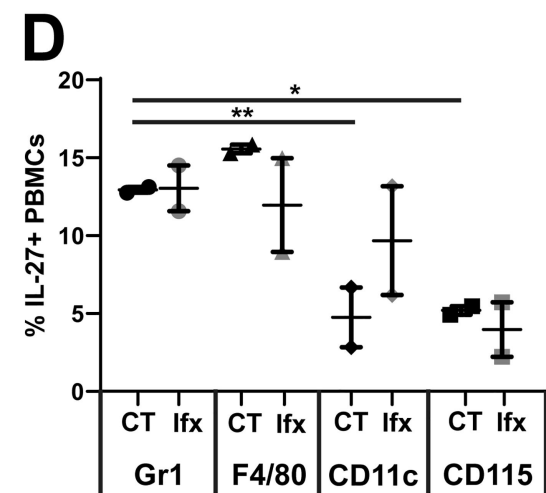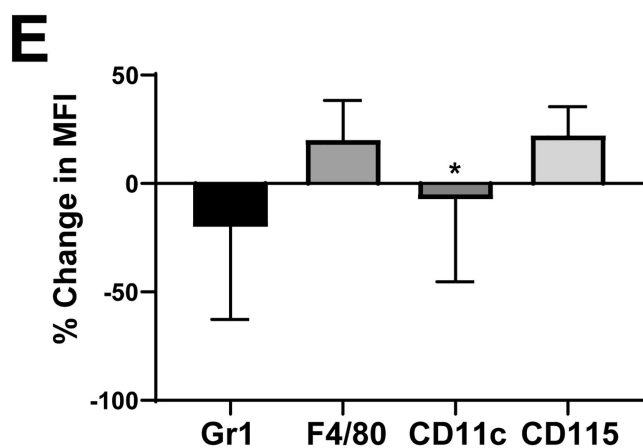

A

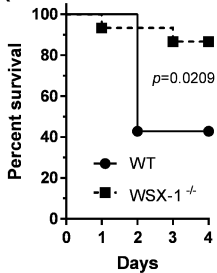

B

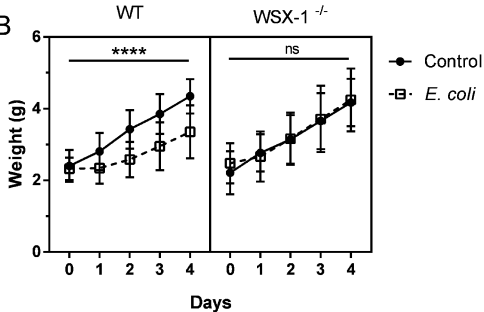

C

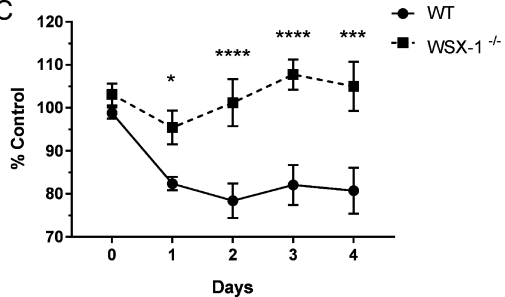

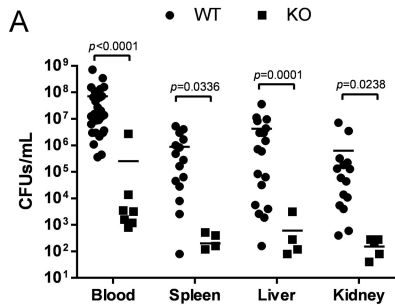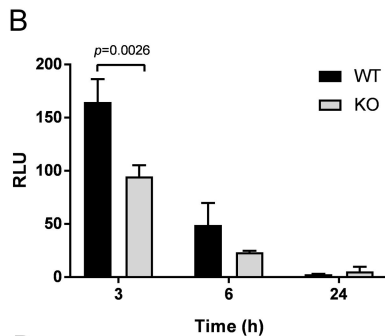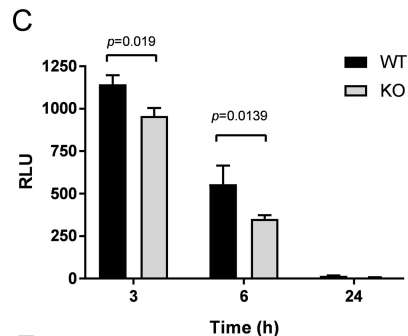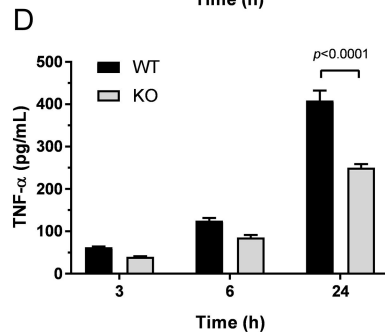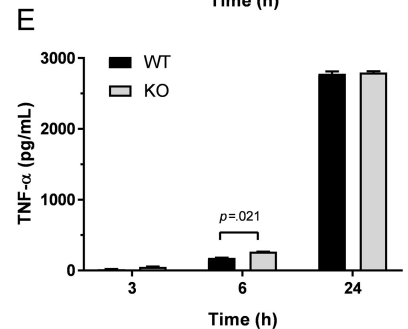

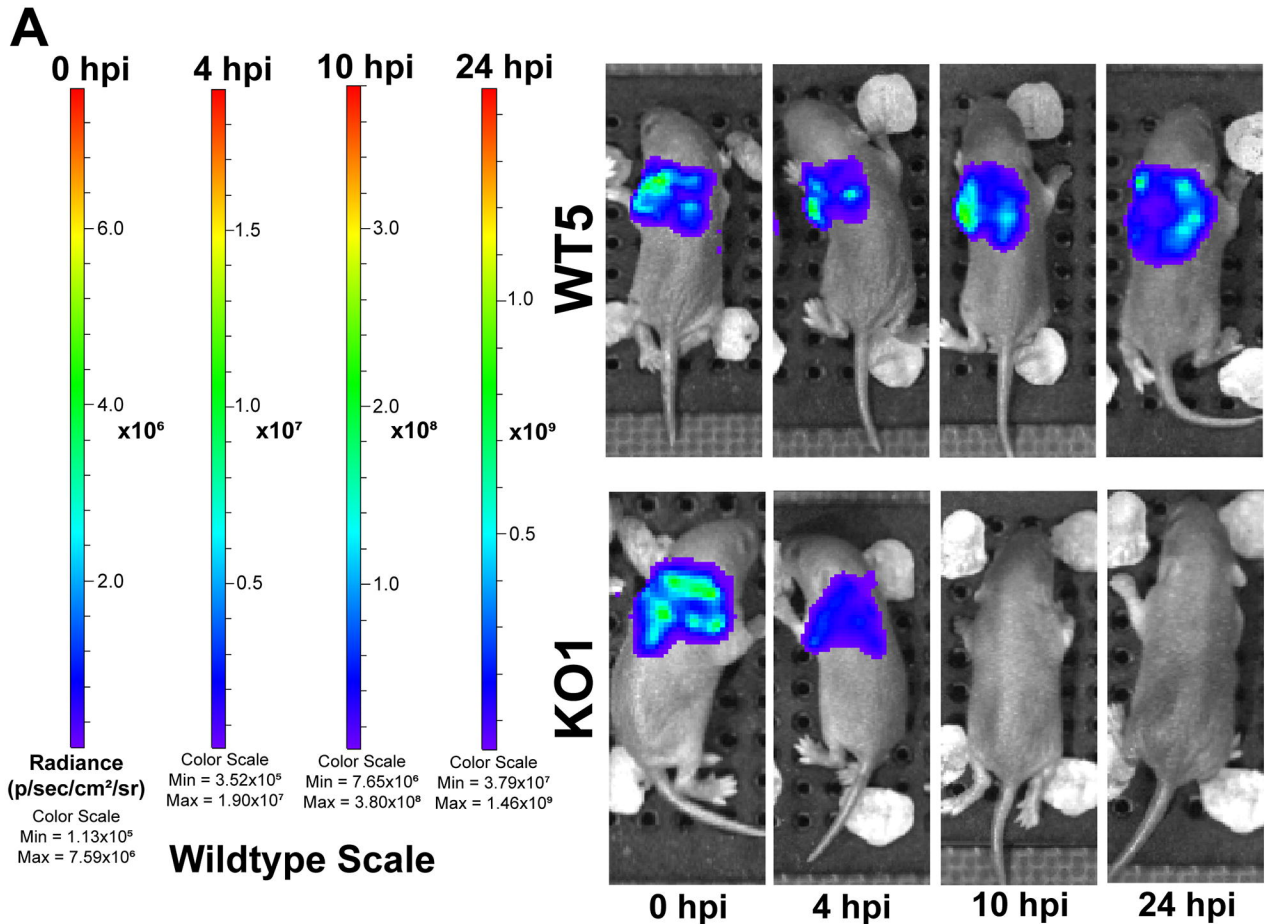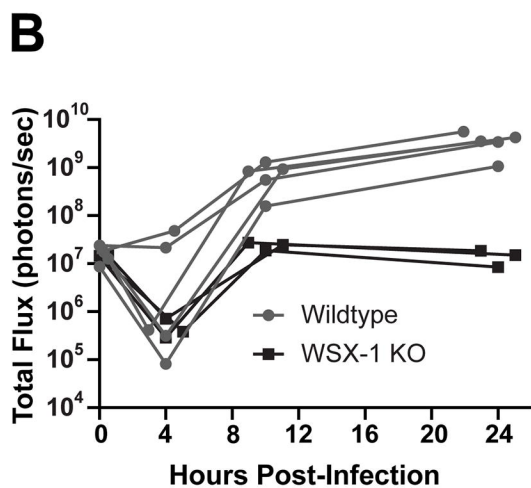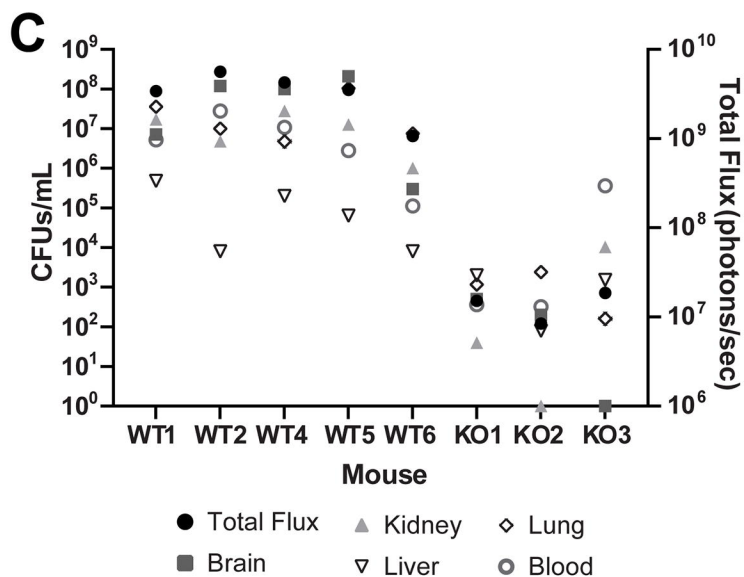

**A**

● WT    ■ KO

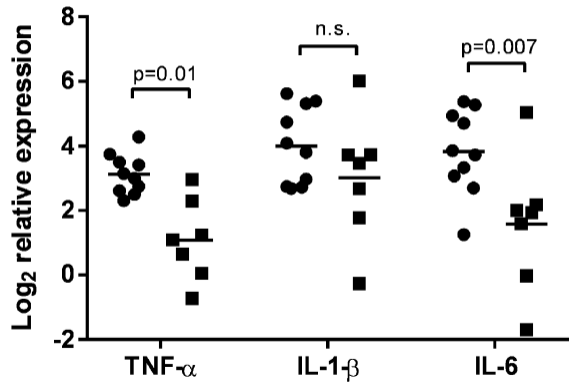**B**

● WT    ■ KO

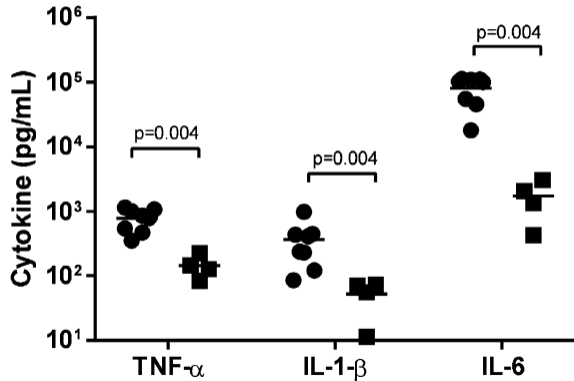

Source: https://www.biorxiv.org/content/10.1101/777839v1.full.pdf
